# Supplementary material
Source: publisher site journal article supplement (https://www.dovepress.com/article/254934)
Supplement: Supplementary file 1 [file get_supplementary_file.php]

**Appendix 1. Sample DCE item**

If the following were your only options, please indicate which option you would choose to try first. (Even if you are currently on treatment, please imagine you are starting over).

Assuming everything else to be the same, which would you **most prefer**?

| **Treatment A** | **Treatment B** |
| --- | --- |
| - **43%** risk of lowering treatment dose due to side effects - **81%** risk of diarrhea with a **9%** chance of severe diarrhea (increase of seven or more loose or watery stools per day which requires hospitalization) - **17%** risk of abdominal (belly) pain with a **1%** chance of severe abdominal pain - **Requires** electrocardiogram (ECG) testing to assess heart function 3 times within the first 3 months of treatment to monitor the 6% risk of arrhythmia - **66%** chance you will develop low white blood cell counts during treatment that may not cause symptoms, but may result in a **5%** risk of a serious infection - 2 pills per day taken with food - Stop taking 1 pill for 7 days per month | - **40%** risk of lowering treatment dose due to side effects - **81%** risk of diarrhea with a **9%** chance of severe diarrhea (increase of seven or more loose or watery stools per day which requires hospitalization) - **11%** risk of abdominal (belly) pain with a **1%** chance of severe abdominal pain - **Does not require** electrocardiogram (ECG) testing to assess heart function      - **22%** chance you will develop low white blood cell counts during treatment that may not cause symptoms, but may result in a **4%** risk of a serious infection - 4 pills per day taken with or without food - Stop taking 3 pills for 7 days per month |

| **SELECT ONE** |  |
| --- | --- |
| Treatment A | 1 |
| Treatment B | 2 |

**Appendix 2. Relative importance of treatment attributes for oncologists and patients**

**Notes**: An asterisk (*) indicates that groups significantly differ at p<0.05. Error bars show 95% confidence intervals.

**Abbreviations**: AE, adverse event; ECG, electrocardiogram.
